# Supplementary material for: Development of naringenin-O-alkylamine derivatives as multifunctional agents for the treatment of Alzheimer’s disease
Source: PubMed Central journal article supplement (PMC8881077; doi:10.1080/14756366.2022.2041627), 2022-02-22

## Supplementary material

# Development of naringenin-*O*-alkylamine derivatives as multifunctional agents for the treatment of Alzheimer's disease

Jing Yang<sup>#,1</sup>, Yi Zhou<sup>#,1</sup>, Yujuan Ban<sup>#,2</sup>, Jing Mi<sup>1</sup>, Ying He<sup>1</sup>, Xinjuan Li<sup>1</sup>, Zhengwei Liu<sup>1</sup>, Keren Wang<sup>1</sup>, Gaofeng Zhu<sup>2</sup>, Wenmin Liu<sup>1</sup>, Zhenghuai Tan<sup>\*,3</sup>, Zhipei Sang<sup>\*,1,2</sup>.

<sup>1</sup>College of Chemistry and Pharmaceutical Engineering, Nanyang Normal University, Nanyang, 473061, China

<sup>2</sup>State Key Laboratory of Functions and Applications of Medicinal Plants, Guizhou Provincial Engineering Technology Research Center for Chemical Drug R&D, Guizhou Medical University, Guiyang, 550004, China

<sup>3</sup>Institute of Traditional Chinese Medicine Pharmacology and Toxicology, Sichuan Academy of Chinese Medicine Sciences, Chengdu, 610041, China

*\*Corresponding Author.*

E-mail: sangzhipei@126.com (Zhipei Sang)

E-mail: tanzhh616@163.com (Zhenghuai Tan)

#These authors contributed equally.

## **Contents**

- A. Representative  $^1\text{H}$ ,  $^{13}\text{C}$  NMR, HR-ESI-MS and HPLC spectra for the synthesized compounds**



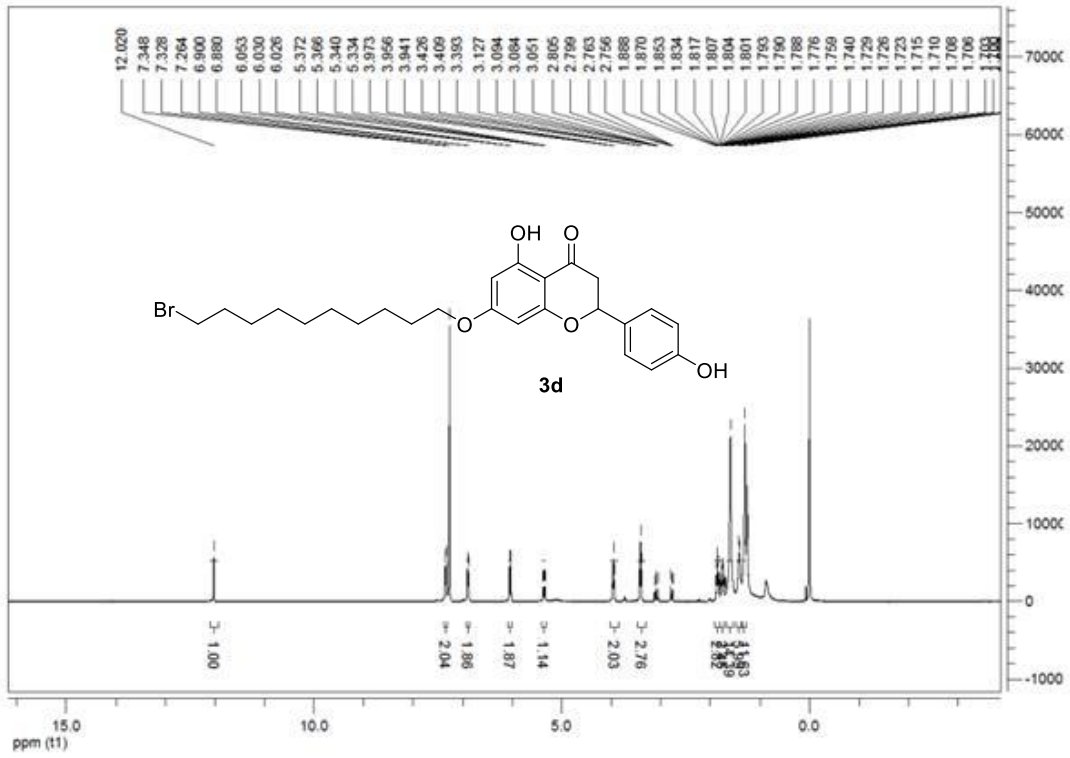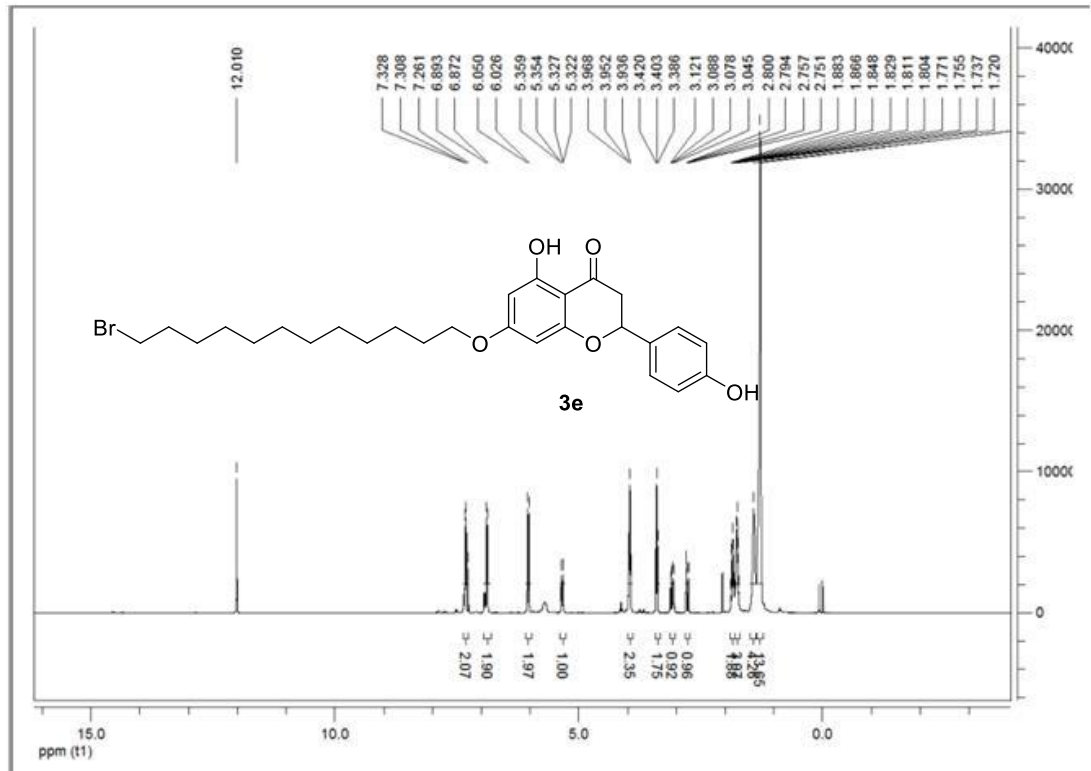



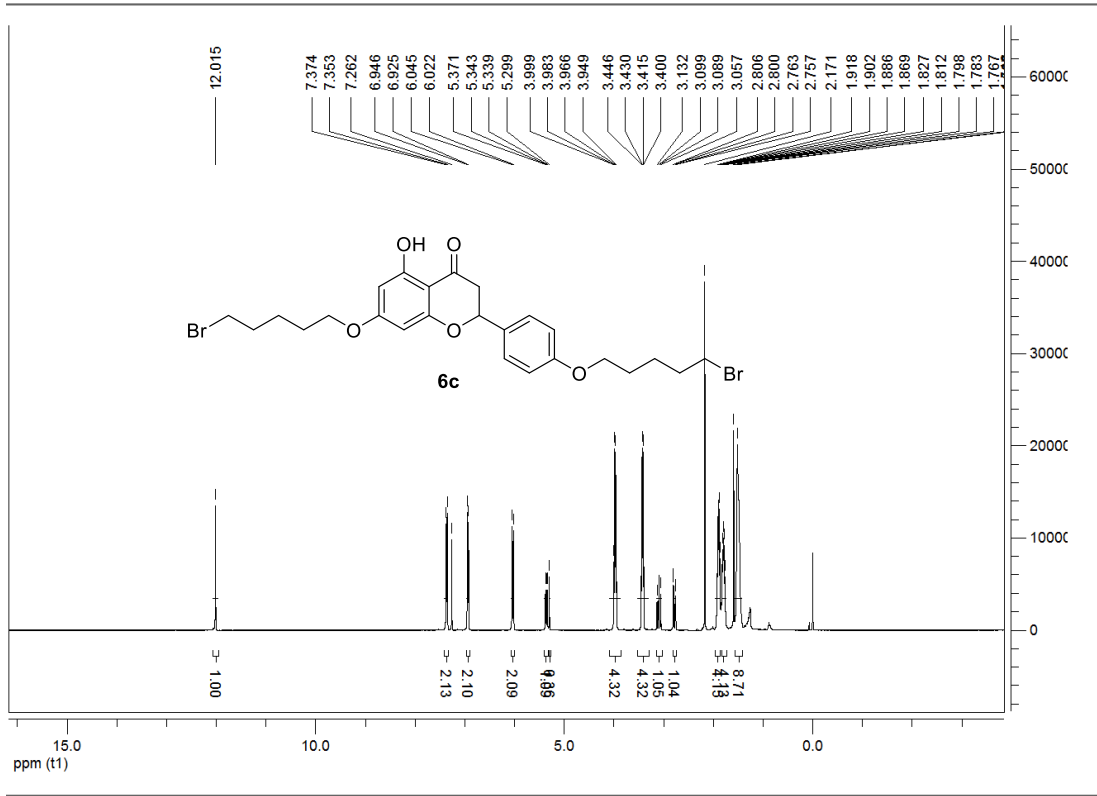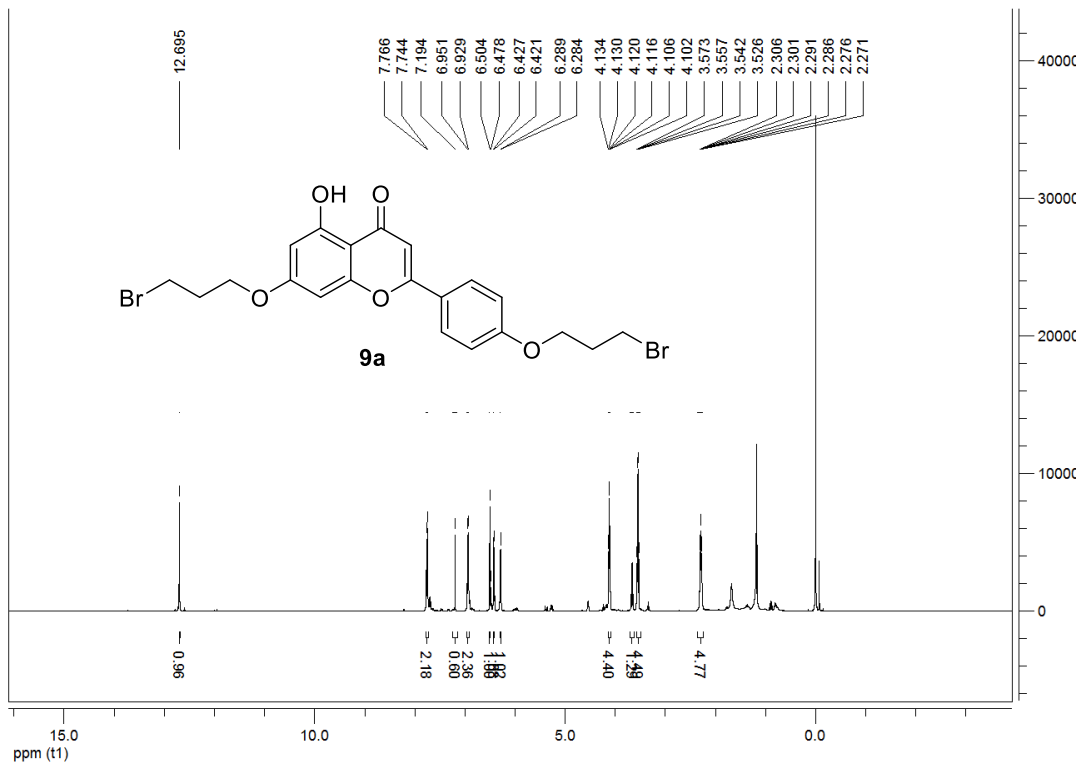

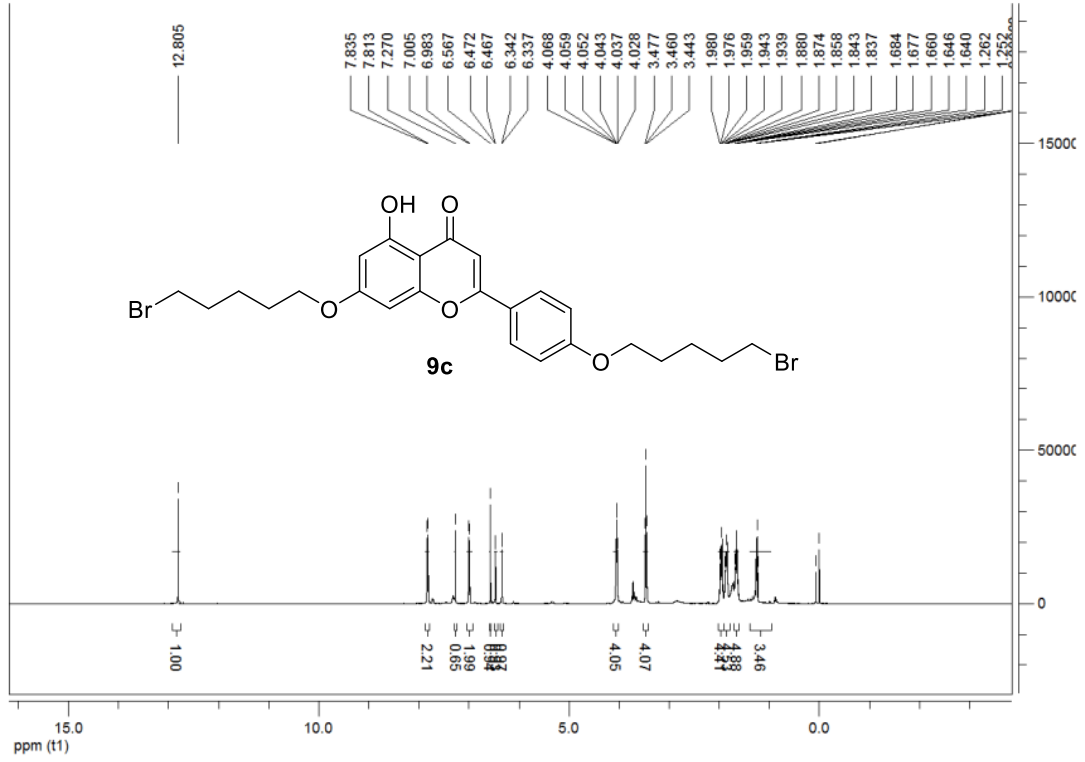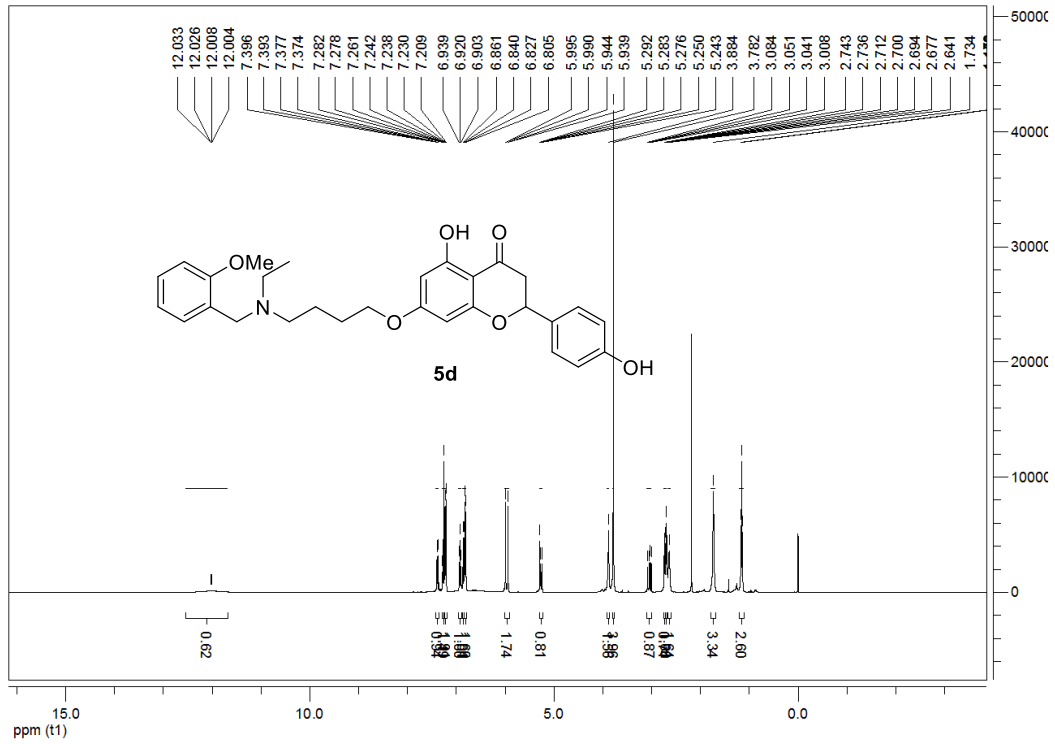







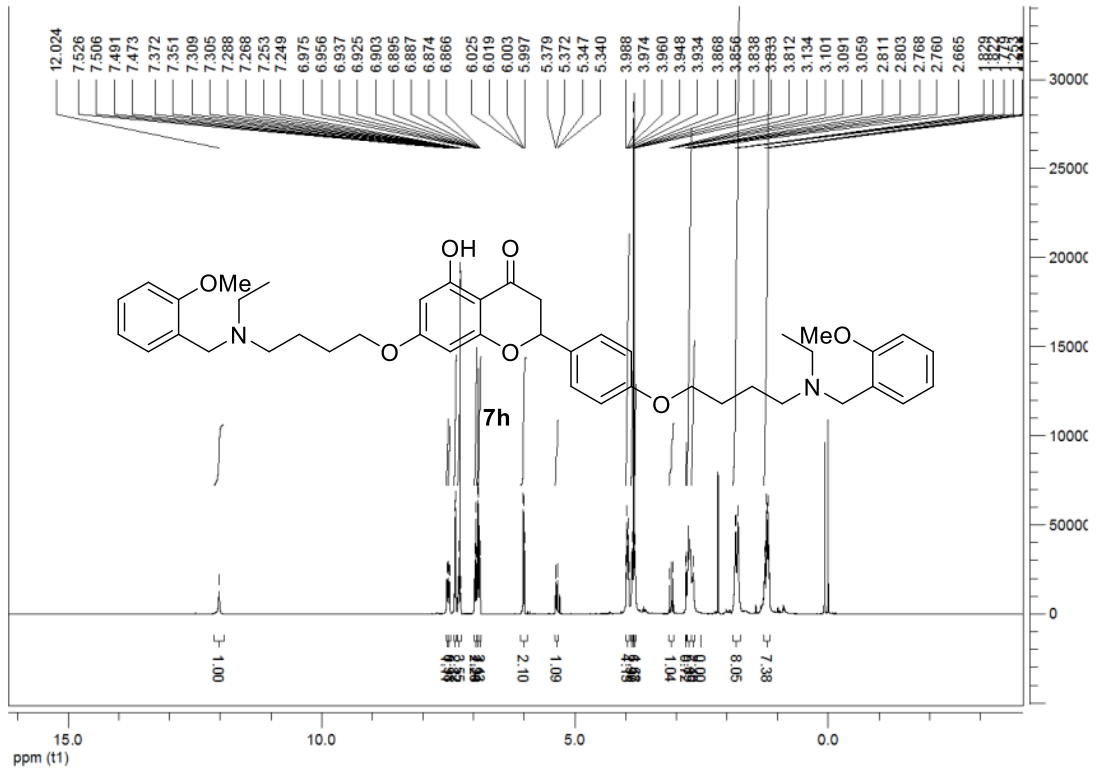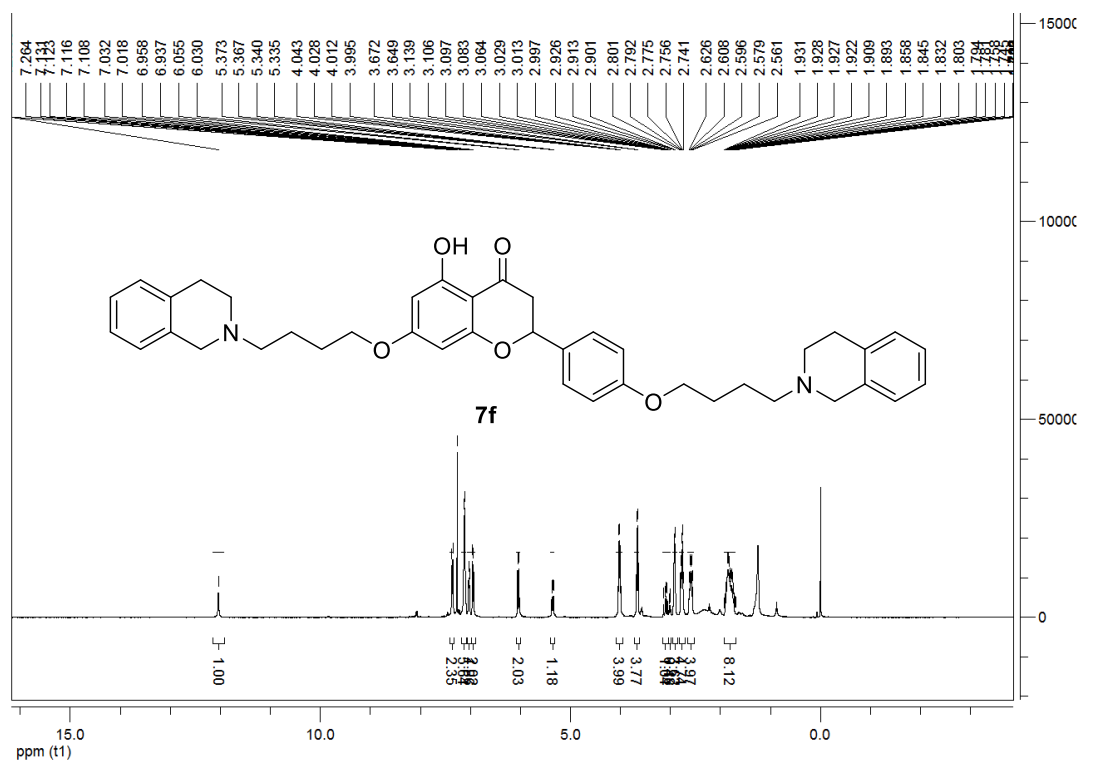

Supplement: IENZ_A_2041627_SM5200.pdf [file IENZ_A_2041627_SM5200.pdf]
